# Supplementary material for: Soil organic carbon and nitrogen storage under a wheat (Triticum aestivum L.)—maize (Zea mays L.) cropping system in northern China was modified by nitrogen application rates
Source: PeerJ. 2022 Jun 30;10:e13568. doi: 10.7717/peerj.13568 (PMC9250766; doi:10.7717/peerj.13568)
Supplement: Supplemental Information 1 [file peerj-10-13568-s001.xls]

## Sheet: Figure 1
Figure 1 Annual mean grain yield in winter wheat (left panel) and summer maize (right panel) after long-term application of different nitrogen rates
Yield (kg ha-1)
Wheat	Repeat	N0	N180	N240	N300			Maize	Repeat	N0	N180	N240	N300
	1	2596.68	7200.04	7463.37	6880.03				1	5025.55	10853.4	10373.9	9970.42
	2	2820.01	7043.37	7310.04	6966.7				2	5647.98	10731.2	10201	10479.9
	3	2786.68	6743.37	7180.04	6673.37				3	4910.29	9624.63	10270.1	10634.4
	4	2086.68	6990.03	7190.04	6506.7				4	5362.13	9467.87	11065.4	10615.9
	5	2346.68	6796.7	7033.37	6710.03				5	5839.32	9297.27	10217.1	10408.4
	6	2440.01	6906.7	6930.03	6546.7				6	6646.18	10258.6	10111	11411.2
	7	2430.01	6860.03	7226.7	6676.7				7	5445.12	9689.17	10005	9735.28
	8	2676.68	6946.7	7170.04	6713.37				8	6028.36	10811.9	10931.7	10650.5
	9	2066.68	7456.7	7130.04	6420.03
	10	2320.01	6963.37	6696.7	6466.7
	11	2323.34	7183.37	6946.7	6790.03
	12	2456.68	6463.37	7163.37	6846.7

## Sheet: Figure 2
	Figure 2 Soil organic carbon (SOC) and total nitrogen (TN) levels in each soil layer under each nitrogen application rates
Wheat								Maize		0-20cm		20-40cm		40-60cm
SOC content(g kg-1)	0-20cm		20-40cm		40-60cm			SOC content(g kg-1)		Average	SE	Average	SE	Average	SE
	Average	SE	Average	SE	Average	SE			N0	9.4	0.31	6.17	0.08	3.67	0.1
N0	12.69	0.27	6.16	0.41	3.62	0.42			N180	10.19	0.2	6.06	0.29	4.33	0.12
N180	13.49	0.7	6.5	0.26	3.67	0.49			N240	10.85	0.22	6.04	0.3	4.14	0.35
N240	13.9	1.09	4.79	0.48	4.45	0.44			N300	10.66	0.32	5.02	0.16	3.46	0.08
N300	12.09	0.66	5.51	0.43	2.96	0.32
TN content(g kg-1)	0-20cm		20-40cm		40-60cm			TN content(g kg-1)		0-20cm		20-40cm		40-60cm
	Average	SE	Average	SE	Average	SE				Average	SE	Average	SE	Average	SE
N0	0.69	0.02	0.37	0.01	0.24	0.01			N0	0.51	0.24	0.42	0.09	0.34	0.02
N180	0.73	0.03	0.34	0	0.27	0			N180	0.55	0.25	0.42	0.08	0.35	0.03
N240	0.75	0.04	0.3	0.01	0.29	0			N240	1.07	0.04	0.55	0	0.35	0.01
N300	0.71	0.02	0.35	0.02	0.24	0			N300	1.05	0	0.49	0.02	0.32	0.01

## Sheet: Figure 3
Figure 3 Soil organic carbon (SOC) and total nitrogen (TN) storage in each soil layer under each nitrogen application rate.
		Wheat	SOC storage(Mg ha-1)	0-20cm		20-40cm		40-60cm			Maize	SOC storage(Mg ha-1)	0-20cm		20-40cm		40-60cm
				Average	SE	Average	SE	Average	SE				Average	SE	Average	SE	Average	SE
			N0	34.7398	0.72962	18.4571	1.21685	10.2084	1.19387			N0	27.6974	0.905828	19.5883	0.249173	11.0986	0.313484
			N180	38.5154	1.98548	19.4216	0.779622	10.2119	1.36799			N180	29.5131	0.588503	19.4924	0.929351	12.9742	0.355627
			N240	38.2164	2.99533	14.1773	1.42664	11.3115	1.12874			N240	31.1768	0.629074	18.9854	0.950259	12.1125	1.01655
			N300	33.7064	1.82955	16.9992	1.3345	8.4064	0.895539			N300	32.3799	0.964038	16.3404	0.51773	10.6485	0.251896
			TN storage(Mg ha-1)	0-20cm		20-40cm		40-60cm				TN storage(Mg ha-1)	0-20cm		20-40cm		40-60cm
				Average	SE	Average	SE	Average	SE				Average	SE	Average	SE	Average	SE
			N0	1.8798	0.0598382	1.09863	0.0199752	0.6862	0.0248701			N0	1.5036	0.69627	1.3428	0.285714	1.02296	0.0562611
			N180	2.08423	0.0824198	1.02638	0.0099649	0.759867	0.00926667			N180	1.6002	0.717482	1.34686	0.252097	1.04631	0.0937733
			N240	2.06253	0.0991541	0.898422	0.0261209	0.745067	0.00846667			N240	3.08002	0.110457	1.73255	0.0113163	1.03263	0.037458
			N300	1.9882	0.0669957	1.08046	0.0471551	0.691067	0.00946667			N300	3.18801	0.000559523	1.59965	0.0503386	0.992592	0.0384491

## Sheet: Figure 4
Figure 4 Correlations between soil organic carbon (SOC) and total nitrogen (TN) contents, and SOC and TN storage
	Wheat					Maize								Wheat					Maize
		X	Y				X	Y						X	Y				X	Y
		TN content(g kg-1)	SOC content(g kg-1)				TN content(g kg-1)	SOC content(g kg-1)						TN Storage(Mg ha-1)	SOC Storage(Mg ha-1)				TN Storage(Mg ha-1)	SOC Storage(Mg ha-1)
		0.67	13.1				0.980546	8.92628						1.83417	35.8622				2.89001	26.3089
		0.36	6.24				0.602109	6.01753						1.07866	18.6968				1.91024	19.0911
		0.24	3.54				0.375488	3.46398						0.6768	9.9828				1.13534	10.4738
		0.68	14.75				1.04585	9.90625						3.58963	64.5418				5.93559	55.8738
		0.35	6.32				0.575533	5.72587						1.94147	42.1128				3.03006	28.7007
		0.27	4.43				0.400099	4.13972						1.04631	18.8935				1.85078	18.413
		0.68	15.06				1.10442	10.5315						0.7506	12.3154				1.19767	12.392
		0.29	5.45				0.558475	5.48819						3.73839	73.3216				6.07851	59.5057
		0.29	4.98				0.33194	3.95137						1.87003	41.4156				3.17471	30.2734
		0.76	13.4				1.04944	11.2716						0.858931	16.142				1.75454	17.242
		0.38	6.35				0.502207	4.72846						0.7366	12.6492				0.970409	11.5516
		0.24	3.58				0.328717	3.4116						3.46556	70.2068				5.89966	59.0671
		0.73	12.78				0.236605	9.29101						2.11826	37.3483				3.18824	34.2434
		0.38	6.82				0.315431	6.24334						1.17307	19.6026				1.63609	15.4044
		0.23	4.39				0.318097	3.78879						0.6816	10.1672				1.01167	10.4996
		0.78	13.37				0.341727	10.5815						3.97293	67.1182				5.83599	60.1474
		0.34	6.16				0.344986	5.82182						1.99843	34.9862				0.697359	27.3839
		0.28	3.84				0.356288	4.31321						1.13859	20.4346				1.00073	19.8075
		0.8	14.91				0.994871	11.2667						0.6486	12.3798				0.961805	11.4559
		0.32	5.06				0.546501	6.52916						3.78561	67.8006				2.6599	58.6473
		0.3	4.81				0.351508	3.66023						2.22698	38.1727				0.990061	30.6569
		0.7	11.33				1.04964	10.2104						1.01642	18.4151				1.10939	18.7215
		0.34	4.92				0.46048	5.04176						0.7784	10.6752				1.06653	12.9113
		0.25	2.75				0.298457	3.34875						4.0218	67.2631				3.16598	62.2898
		0.66	12.19				0.313312	9.97486						2.20003	41.0031				2.85982	32.3869
		0.36	5.42				0.352213	6.26186						0.947786	14.9869				1.71692	20.5124
		0.26	2.93				0.321381	3.75911						0.762	12.2174				1.02761	10.7005
		0.73	12.35				0.269393	10.0723						3.90982	68.2073				5.60436	63.5998
		0.34	7.01				0.335974	6.63685						1.95103	31.5789				3.18885	31.0196
		0.27	2.75				0.292214	4.54966						1.04959	15.1882				1.50015	16.425
		0.77	11.72				1.11513	10.7391						0.71	7.81				0.91854	10.3062
		0.3	3.85				0.54945	6.112						3.71062	54.577				5.60753	57.7508
		0.29	3.57				0.376226	4.81804						1.8068	33.371				0.92344	29.3994
		0.68	11.55				1.04902	10.4926						1.07866	16.2398				1.11742	19.8663
		0.33	5.25				0.510377	5.27714						0.7332	8.2626				0.971737	11.3662
		0.24	2.55				0.340382	3.61961						3.61866	57.8734				3.0126	60.6319
														2.08423	35.2605				0.780493	29.1818
														1.01642	20.9562				1.08041	21.3425
														0.7506	7.645				0.874725	13.6191
														3.85125	63.8617				2.73563	64.1435
														2.11753	32.2305				3.20552	30.8701
														0.888549	11.403				1.72619	19.2019
														0.7366	9.0678				1.09988	14.0853
														3.74268	52.7013				6.03158	64.1572
														1.89529	32.192				3.18695	31.8768
														1.01872	16.2069				1.6627	17.1918
														0.6816	7.242				1.04757	11.1398
														3.59561	55.6409				5.89722	60.2084

## Sheet: Figure 5
Figure 5 Carbon and nitrogen sequestration in each soil layer under each nitrogen level after maize planting
	Maize
	SOC sequestration(Mg ha-1)	0-20cm	20-40cm	40-60cm	0-60cm			TN sequestration(Mg ha-1)	0-20cm	20-40cm	40-60cm	0-60cm
	N0	-7.04242	1.13125	0.890202	-5.02097			N0	-0.376197	0.244165	0.336759	0.204728
	N180	-9.00221	0.070762	2.76229	-6.16916			N180	-0.484022	0.320473	0.286442	0.122893
	N240	-7.03959	4.80815	0.800991	-1.43045			N240	1.01749	0.834129	0.287566	2.13918
	N300	-1.32647	-0.658825	2.24214	0.256842			N300	1.19982	0.519187	0.301526	2.02053

## Sheet: Figure 6
Figure 6 Dynamics of soil bulk density in at each soil depth under each nitrogen application rate
	0-20cm		20-40cm		40-60cm				0-20cm		20-40cm		40-60cm
Wheat	Average	SE	Average	SE	Average	SE		Maize	Average	SE	Average	SE	Average	SE
N0	1.37	0.08	1.5	0.03	1.41	0.03		N0	1.47	0.04	1.59	0.02	1.51	0.07
N12	1.43	0.04	1.49	0.03	1.39	0.06		N180	1.45	0.07	1.61	0.04	1.5	0.01
N16	1.38	0.03	1.48	0.05	1.27	0.04		N240	1.44	0.04	1.57	0.06	1.46	0.09
N20	1.39	0.05	1.54	0.03	1.42	0.05		N300	1.52	0.04	1.63	0.05	1.54	0.09
